# Supplementary material for: Fabrication of nanostructured NiO/WO3with graphitic carbon nitride for visible light driven photocatalytic hydroxylation of benzene and metronidazole degradation
Source: Royal Society of Chemistry journal article supplement (doi:10.1039/c9nj02904d), 2019-01-01
Supplement: c9nj02904d1.pdf [file c9nj02904d1.pdf]

## SUPPORTING INFORMATION

### **Fabrication of nanostructured NiO/WO<sub>3</sub> with graphitic carbon nitride for visible light driven photocatalytic C-H activation and metronidazole degradation**

Meghali Devi,<sup>a</sup> Bishal Das,<sup>a</sup> Monjur Hassan Barbhuiya,<sup>a</sup> Bishal Bhuyan,<sup>a</sup> Siddhartha Sankar Dhar\*<sup>a</sup> and Sethumathavan Vadivel<sup>b</sup>

[a] Department of Chemistry, National Institute of Technology, Silchar, Cachar, 788010, Assam, India, E-mail: [ssd\\_iitg@hotmail.com](mailto:ssd_iitg@hotmail.com)

[b] Department of Chemistry, PSG College of Technology, Peelamedu, Coimbatore, 641004, Tamil Nadu, India

(New Journal of Chemistry)

Figure S1: XRD patterns of the nanomaterials.

Figure S2: SEM micrographs of the nanomaterials.

Figure S3: TEM micrographs of the nanomaterials.

Figure S4: <sup>1</sup>H NMR of end product of hydroxylation of benzene reaction (phenol).

Figure S5: <sup>13</sup>C NMR of end product of hydroxylation of benzene reaction (phenol).

Figure S6: Plot of C/C<sub>0</sub> vs. irradiation time for decomposition of Metronidazole

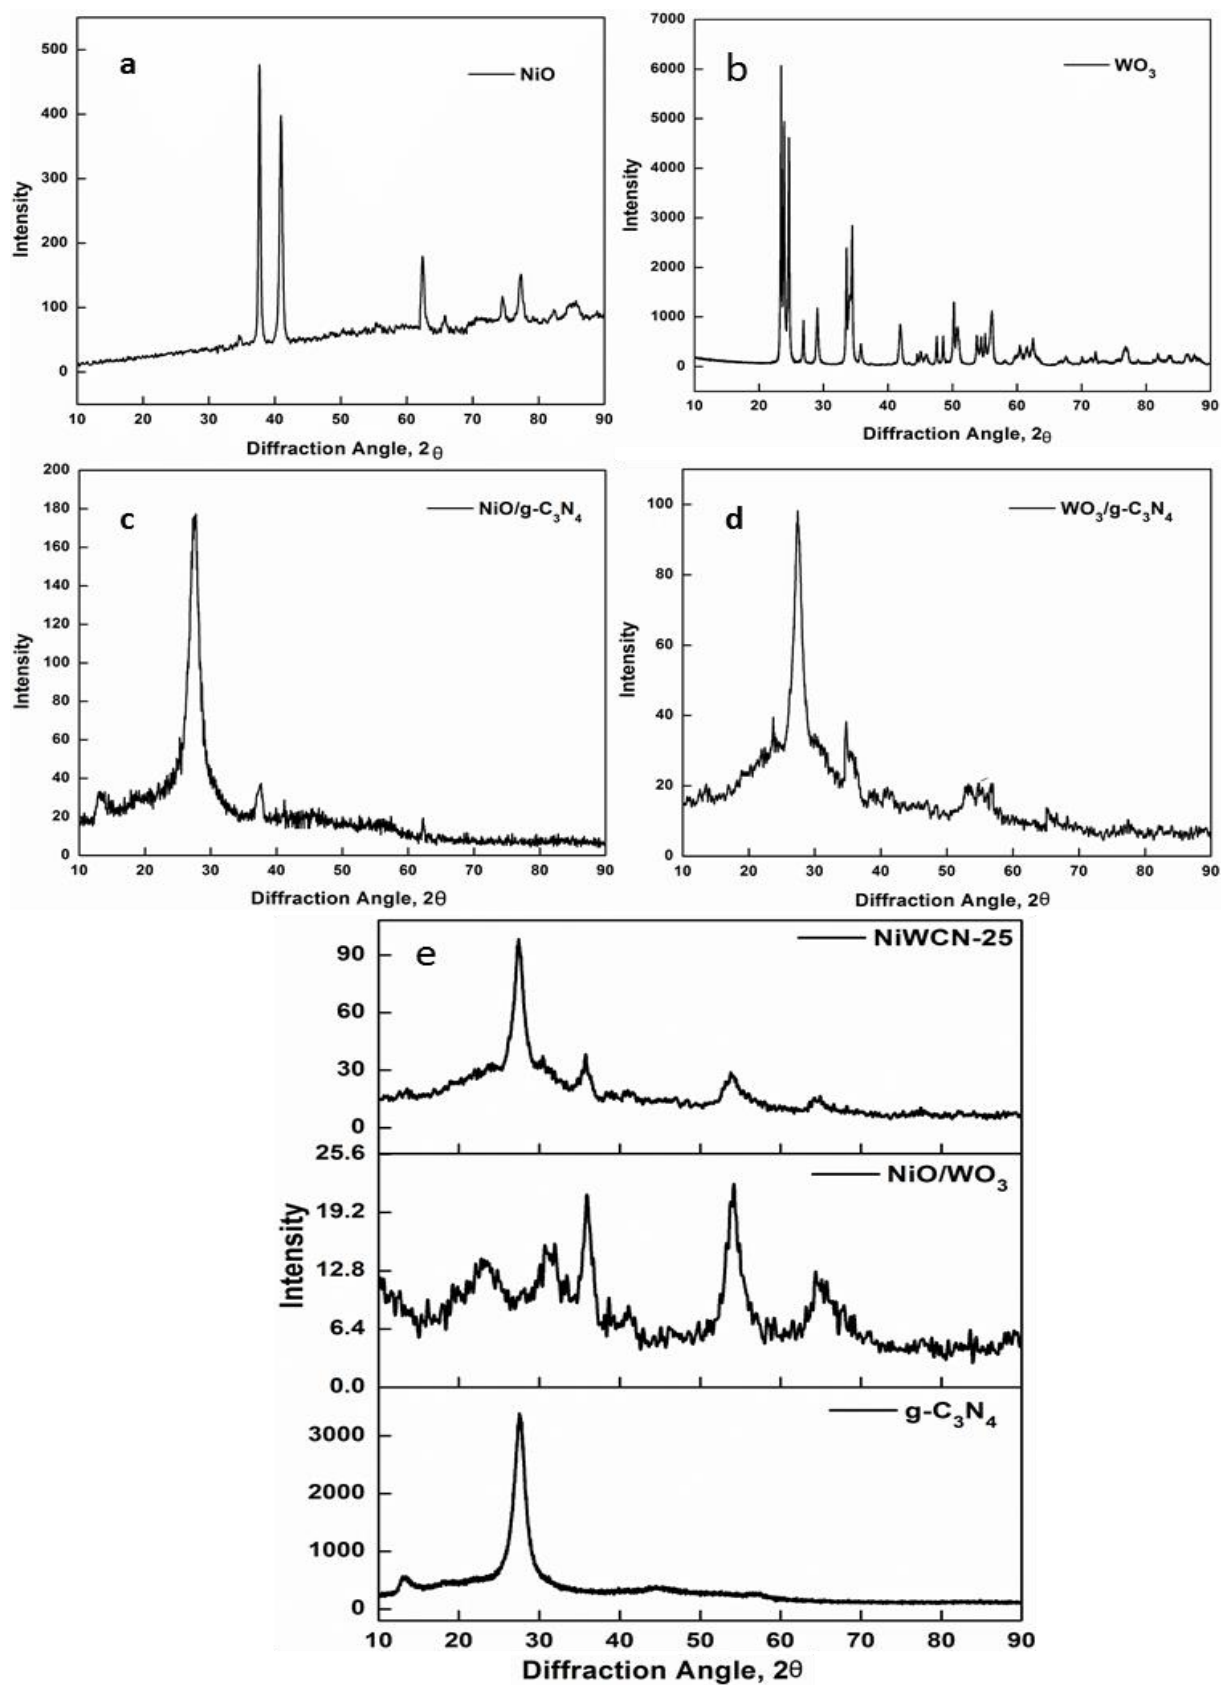

Figure S1: XRD patterns of (a) NiO (b)  $\text{WO}_3$ , (c)  $\text{NiO/g-C}_3\text{N}_4$ , (d)  $\text{WO}_3/\text{g-C}_3\text{N}_4$ , (e) Comparison of  $\text{NiO/WO}_3/\text{g-C}_3\text{N}_4$ ,  $\text{NiO/WO}_3$ , and  $\text{g-C}_3\text{N}_4$ .

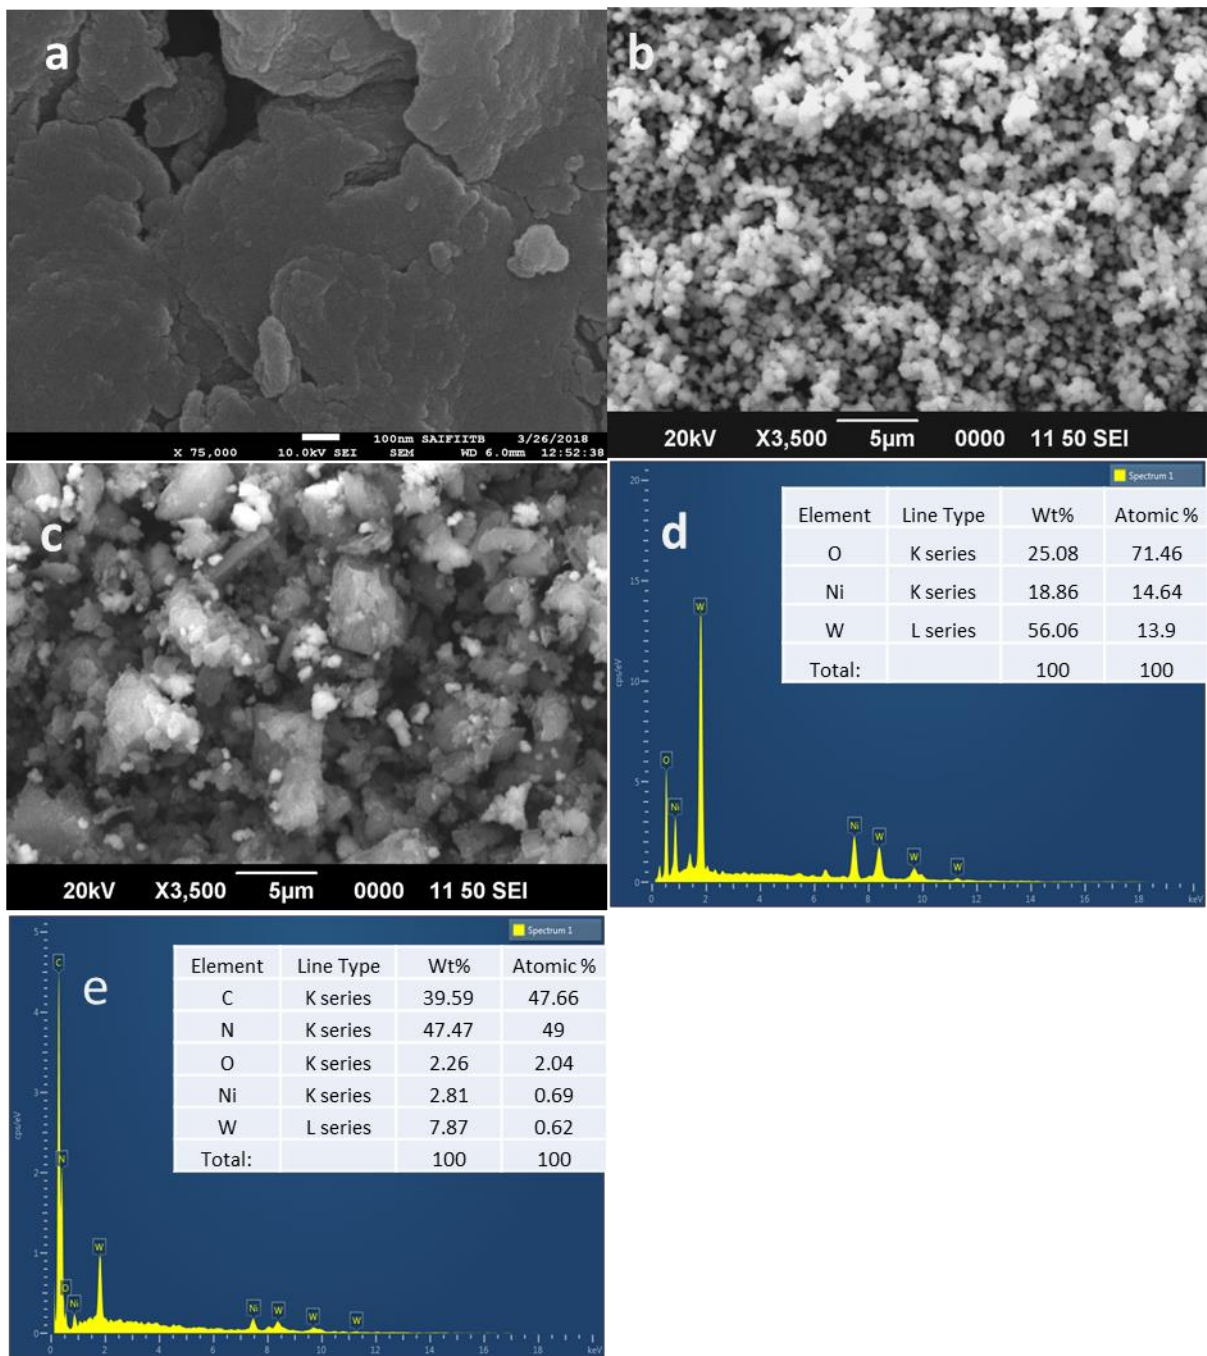

Figure S2: SEM image of (a)  $g\text{-C}_3\text{N}_4$ , (b) nanostructured  $\text{NiO}/\text{WO}_3$ , (c)  $\text{NiO}/\text{WO}_3@g\text{-C}_3\text{N}_4$  nanohybrid, (d) EDS pattern of  $\text{NiO}/\text{WO}_3$ , (e) EDS pattern of  $\text{NiO}/\text{WO}_3@g\text{-C}_3\text{N}_4$  nanohybrid.

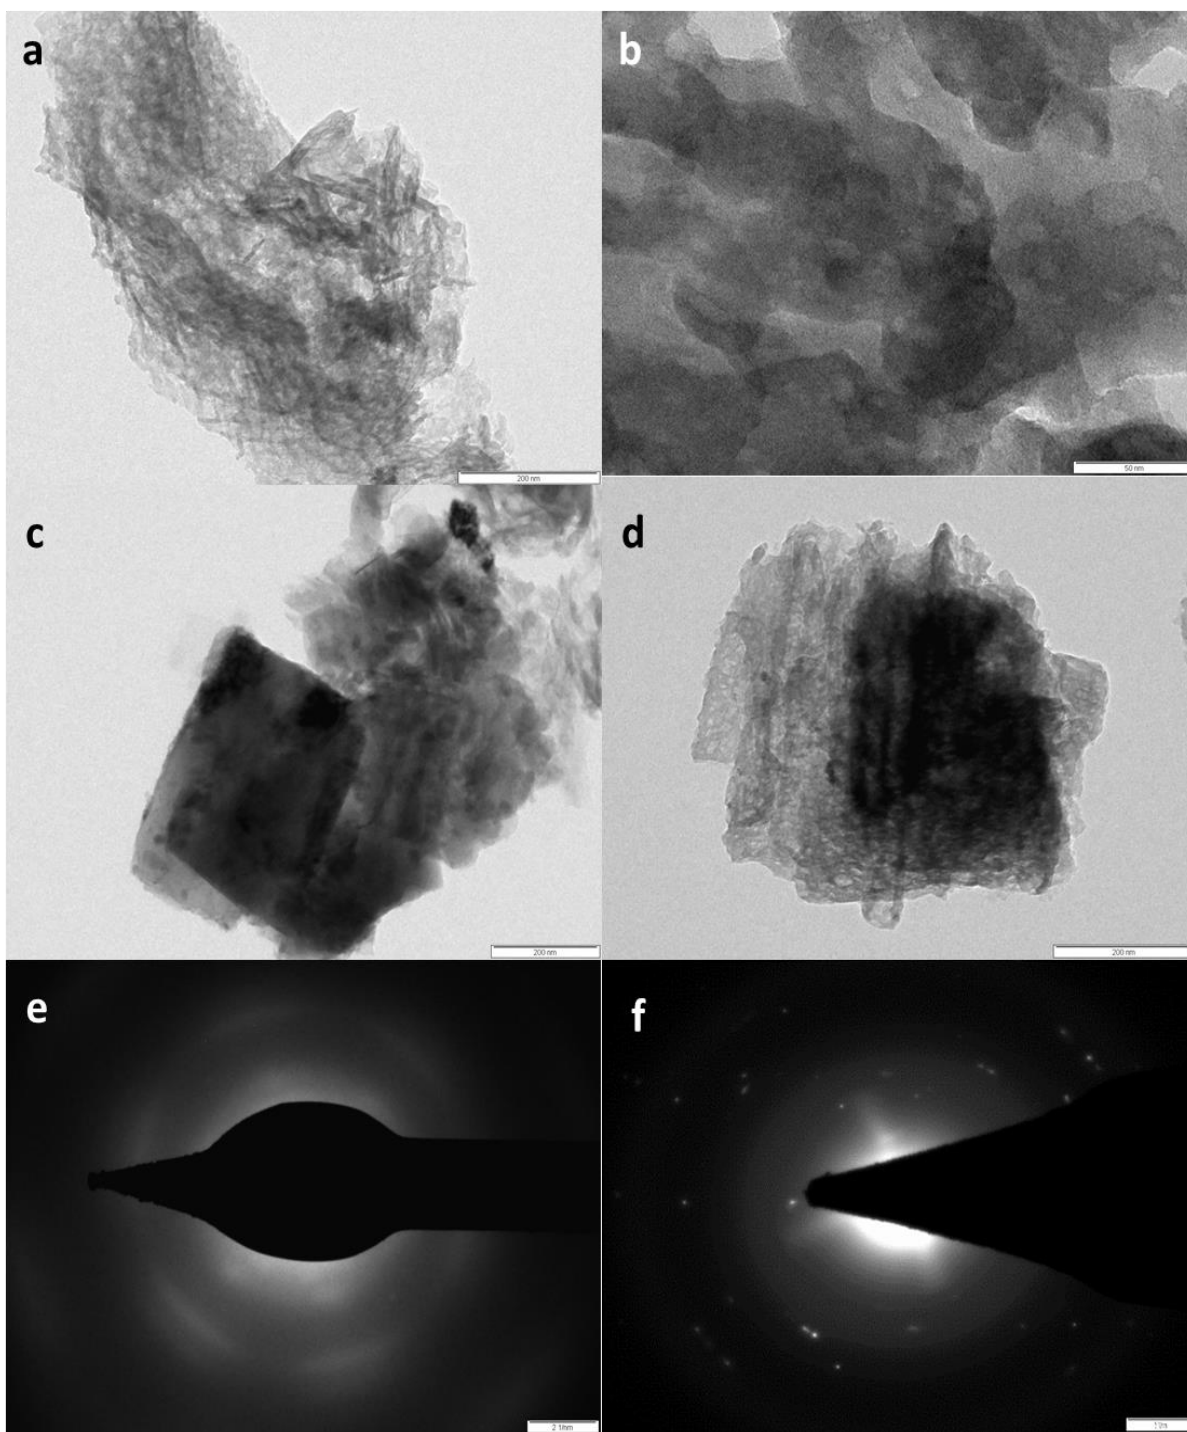

Figure S3: TEM image of (a) g-C<sub>3</sub>N<sub>4</sub> (scale 200 nm), (b) g-C<sub>3</sub>N<sub>4</sub> (scale 50 nm), (c) NiO/WO<sub>3</sub>@g-C<sub>3</sub>N<sub>4</sub> nanohybrid (scale 200 nm), (d) NiO/WO<sub>3</sub>@g-C<sub>3</sub>N<sub>4</sub> nanohybrid (scale 200 nm), (e) ED pattern of g-C<sub>3</sub>N<sub>4</sub> (scale 21 nm), (f) ED pattern of NiO/WO<sub>3</sub>@g-C<sub>3</sub>N<sub>4</sub> nanohybrid (scale 51nm)

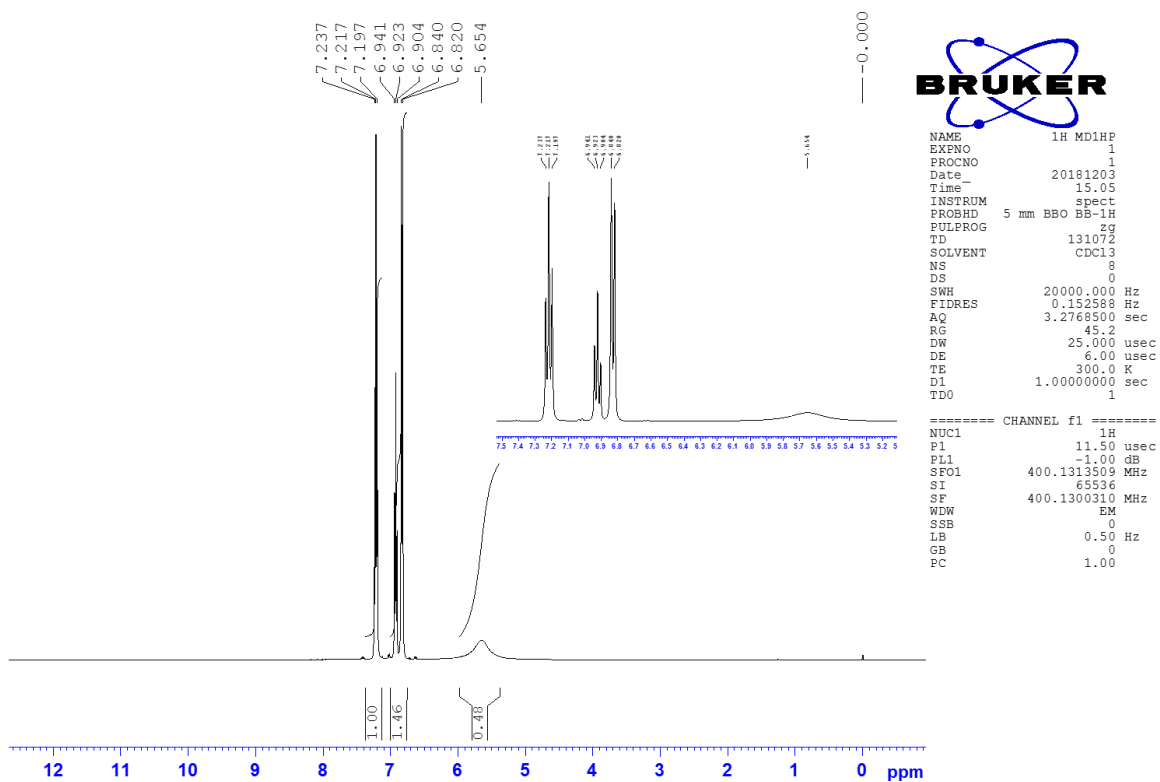

Figure S4:  $^1\text{H}$  NMR spectra of phenol

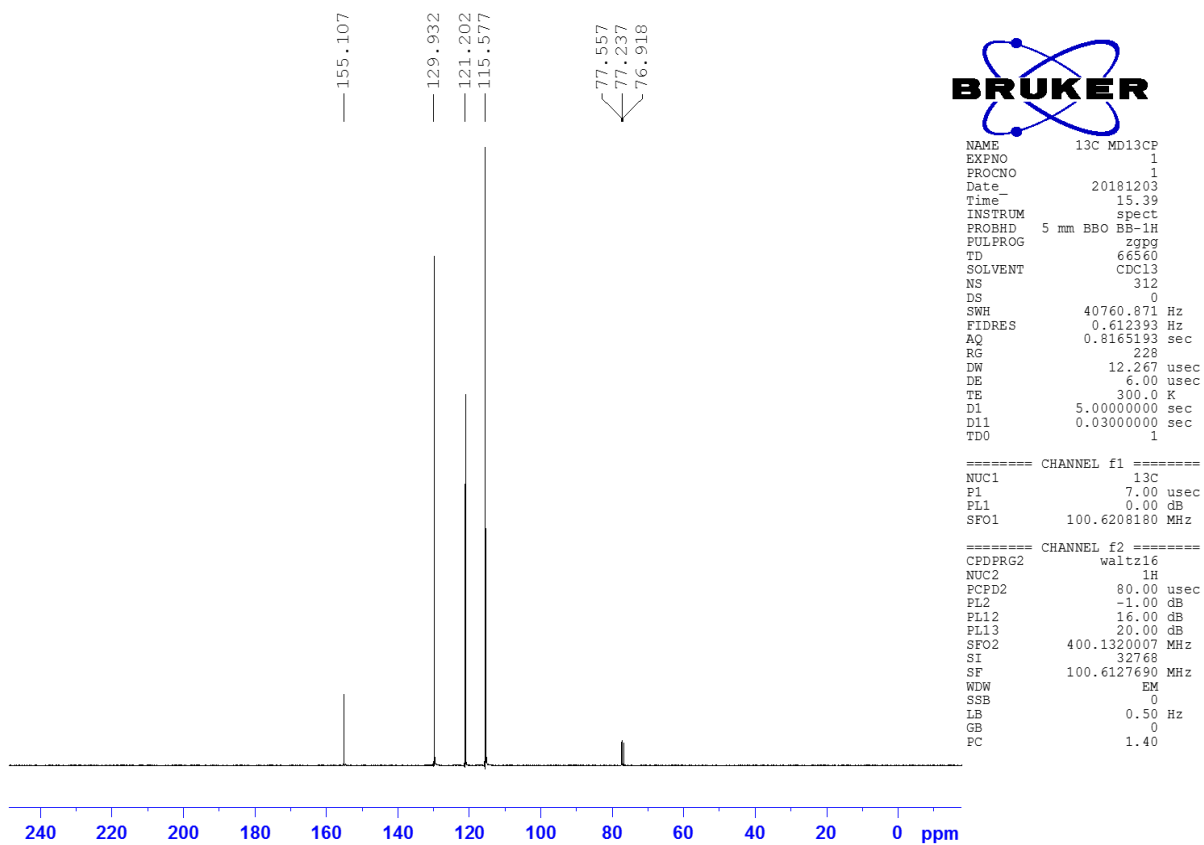

Figure S5:  $^{13}\text{C}$  NMR spectra of phenol

Presentation of Physical Data: Melting Point=41°C.  $^1\text{H}$  NMR: (300 MHz,  $\text{CDCl}_3$ , TMS): $\delta$ = 7.23 (t, J= 2 Hz, 2 H), 6.94 (t, J= 0.8 Hz, 1 H), 6.82 (d, J= 2 Hz, 2 H), 5.65 (s, 1 H) ppm.  $^{13}\text{C}$  NMR:  $\delta$ = 155.107, 129.932, 121.202, 115.577, 77.23 ppm

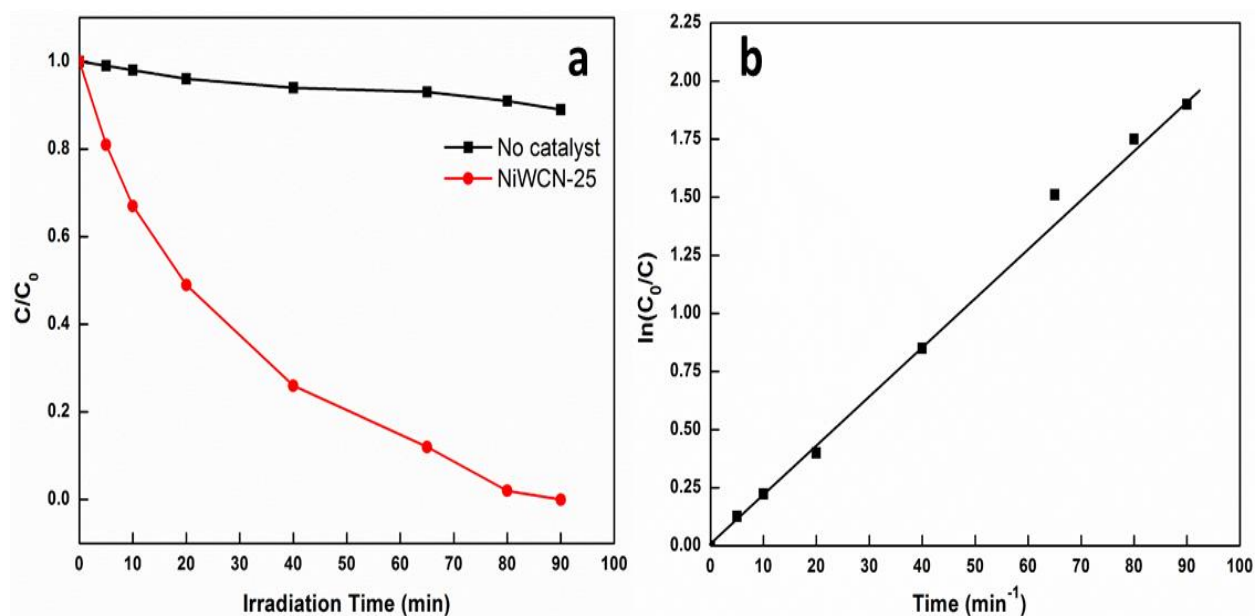

Figure S6: (a) Plot of  $C/C_0$  vs. irradiation time for decomposition of Metronidazole catalysed by NiWCN-25 and in absence of catalyst, (b) First order kinetic fitting for decomposition of Metronidazole catalysed by NiWCN-25.
